# Supplementary material for: Highly Sensitive and Stable Multifunctional Self-Powered Triboelectric Sensor Utilizing Mo2CTx/PDMS Composite Film for Pressure Sensing and Non-Contact Sensing
Source: MDPI journal article supplement (doi:10.3390/nano14050428), 2024-02-27
Supplement: s1 [file s1]

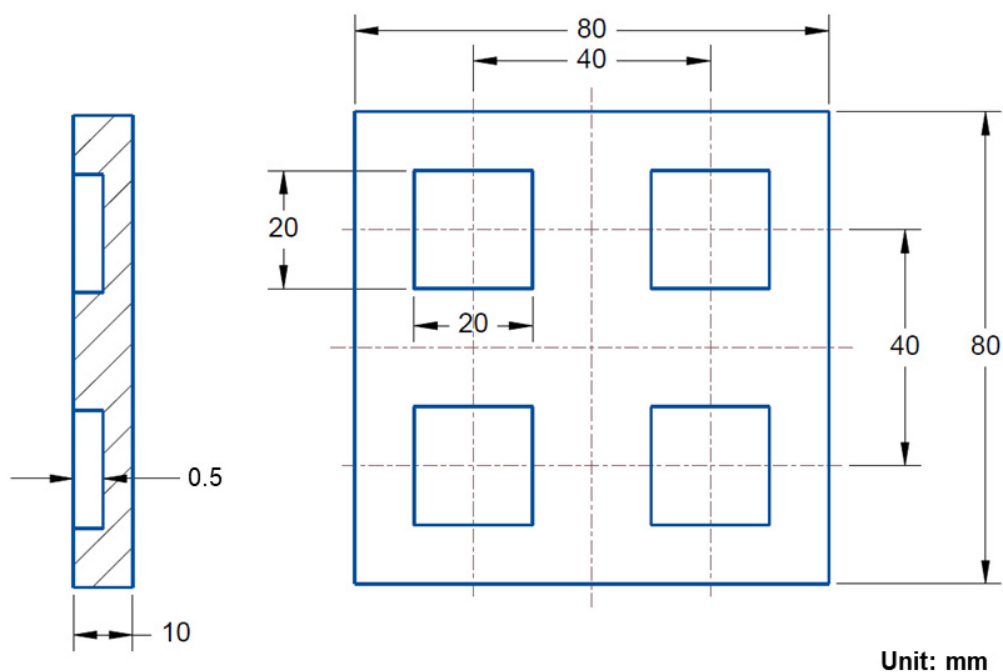

**Figure S1.** Dimensional drawing of PTFE mould

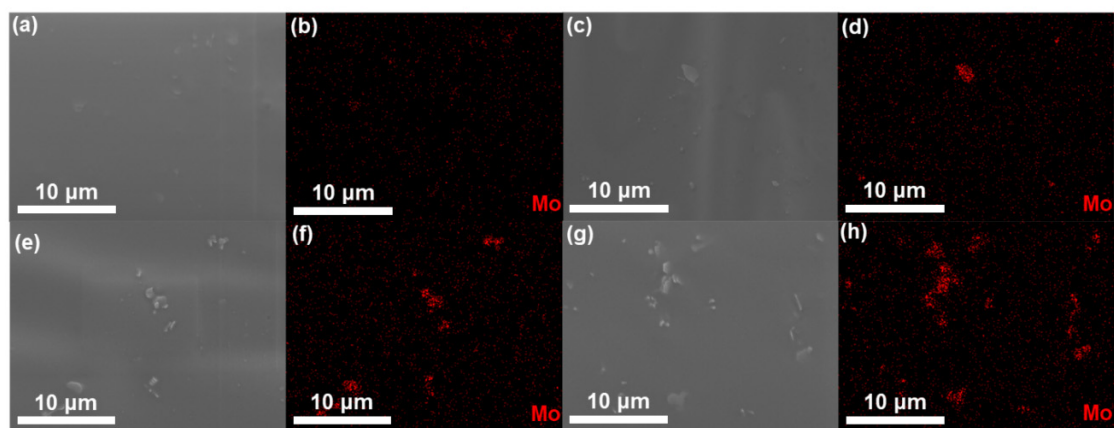

**Figure S2.** The EDS images depict  $\text{Mo}_2\text{CT}_x$  particles that have been mixed with varying mass fractions.: (a-b) The EDS images of  $\text{Mo}_2\text{CT}_x/\text{PDMS}$  composite films mixed with  $\text{Mo}_2\text{CT}_x$  particles with a mass fraction of 1 wt%. (c-d) The EDS images of  $\text{Mo}_2\text{CT}_x/\text{PDMS}$  composite films mixed with  $\text{Mo}_2\text{CT}_x$  particles with a mass fraction of 2 wt%. (e-f) The EDS images of  $\text{Mo}_2\text{CT}_x/\text{PDMS}$  composite films mixed with  $\text{Mo}_2\text{CT}_x$  particles with a mass fraction of 4 wt%. (g-h) The EDS images of  $\text{Mo}_2\text{CT}_x/\text{PDMS}$  composite films mixed with  $\text{Mo}_2\text{CT}_x$  particles with a mass fraction of 5 wt%.

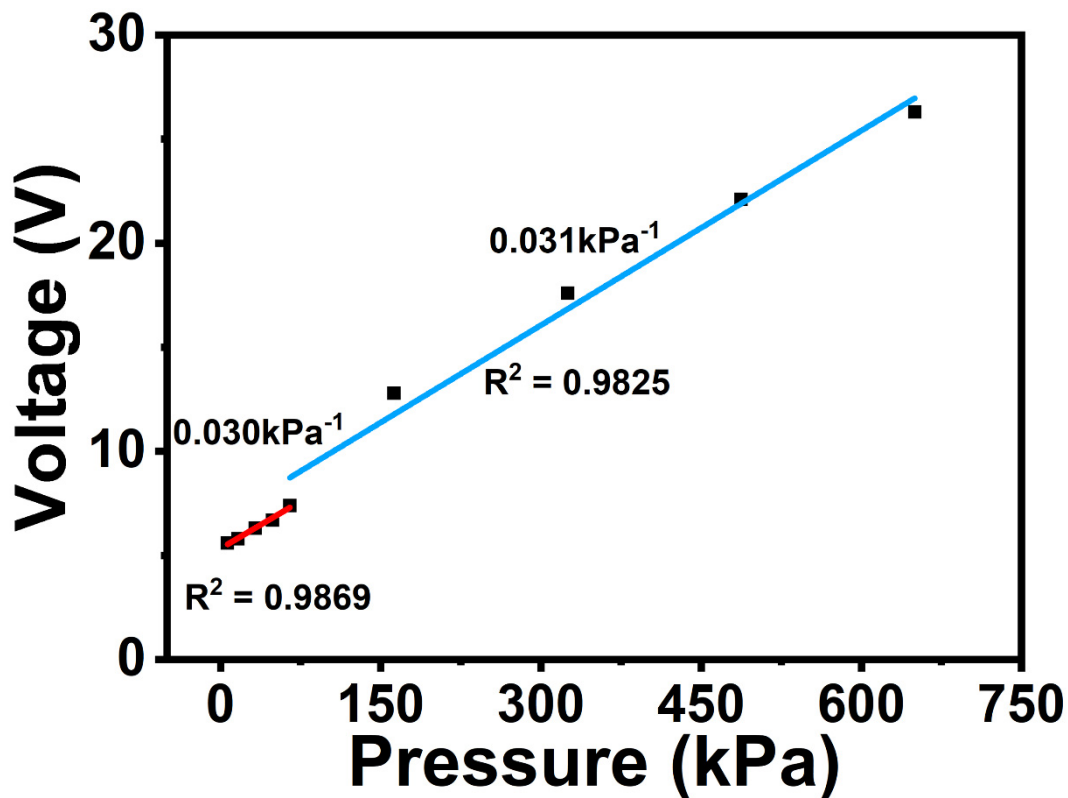

**Figure S3:** The output voltage and pressure relationship curve of Mo-TES0.

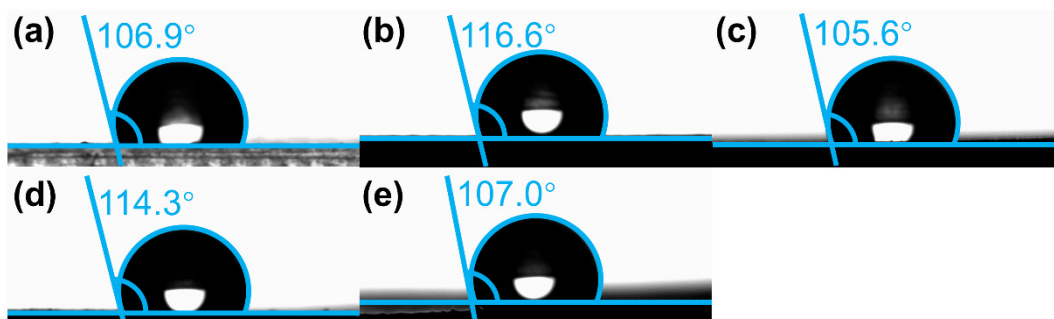

**Figure S4.** The water contact angle of Mo<sub>2</sub>CT<sub>x</sub> particles mixed with varying mass fractions is depicted in the images: (a) The water contact angle images of pure PDMS films. (b) The water contact angle images of Mo<sub>2</sub>CT<sub>x</sub>/PDMS composite films mixed with Mo<sub>2</sub>CT<sub>x</sub> particles with a mass fraction of 1 wt%. (c) The water contact angle images of Mo<sub>2</sub>CT<sub>x</sub>/PDMS composite films mixed with Mo<sub>2</sub>CT<sub>x</sub> particles with a mass fraction of 2 wt%. (d) The water contact angle images of Mo<sub>2</sub>CT<sub>x</sub>/PDMS composite films mixed with Mo<sub>2</sub>CT<sub>x</sub> particles with a mass fraction of 4 wt%. (e) The water contact angle images of Mo<sub>2</sub>CT<sub>x</sub>/PDMS composite films mixed with Mo<sub>2</sub>CT<sub>x</sub> particles with a mass fraction of 5 wt%.
